# Supplementary material
Source: Hindawi journal article supplement (doi:10.1155/2010/121259)
Supplement: f1 [file 121259.f1.pdf]

## Cation Involvement in Telomestatin Binding to G-Quadruplex DNA

Valérie Gabelica<sup>1,2\*</sup>, Frédéric Rosu<sup>1,2\*</sup>, Nicolas Smargiasso<sup>1,2</sup>, Gabriel Mazzucchelli<sup>1,2</sup>, Kazuo Shinya<sup>3</sup>, Edwin De Pauw<sup>1,2</sup>

1. Mass Spectrometry Laboratory, Department of Chemistry, University of Liège, Belgium
2. GIGA-Systems Biology and Chemical Biology, University of Liège, Belgium
3. Biomedical Information Research Center, National Institute of Advanced Industrial Science and Technology, Biological Systems Control Team, Tokyo, Japan.

\* Joint first authors.

### Supporting information

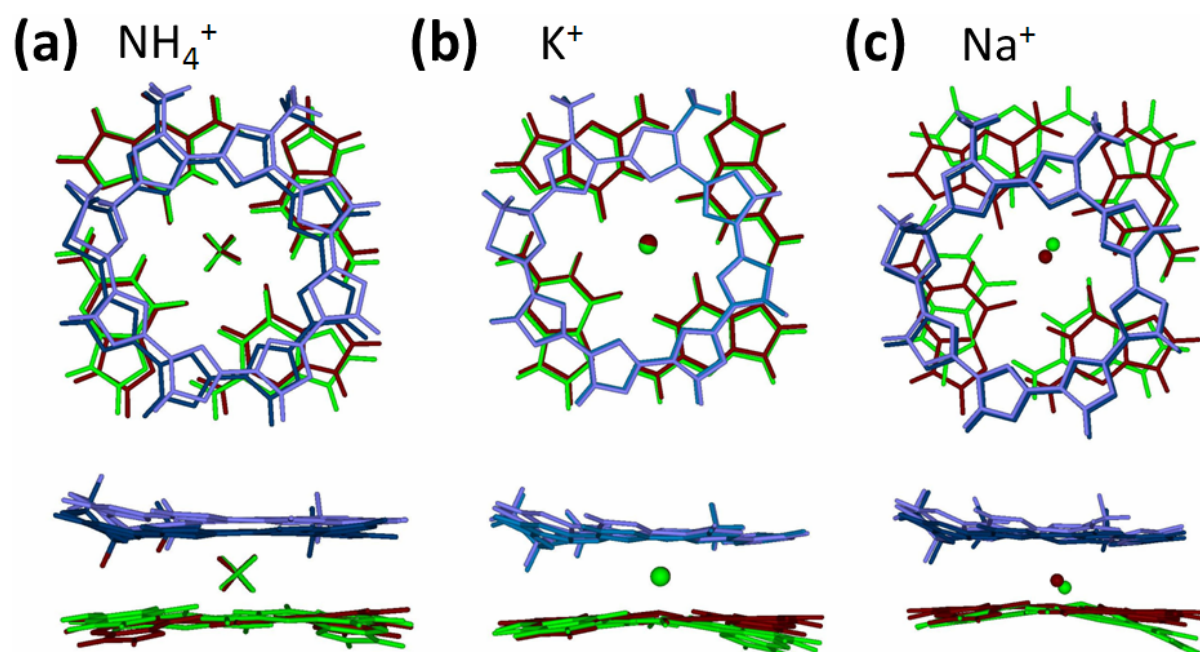

**Supporting Information Figure S1:** Manual superimposition of optimized geometry of the ternary complex telomestatin - cation - G-quartet obtained using B3LYP and MPWB1K functionals (top view and side view). (a)  $\text{NH}_4^+$ , (b)  $\text{K}^+$ , (c)  $\text{Na}^+$ . The B3LYP optimized structures are in green (G-quartet) and purple (telomestatin). The MPWB1K optimized structures are in red (G-tetrad) and blue (telomestatin).

**Supporting Information Table S1:** Comparison of the geometries optimized with the different hybrid functional: root mean square distances (RMSD) of two-by-two comparisons (in Å).

|                                   | Cation + telomestatin complex | Cation + telomestatin + G-quartet complex |
|-----------------------------------|-------------------------------|-------------------------------------------|
| <b>B3LYP vs BHHLYP</b>            |                               |                                           |
| <b>NH<sub>4</sub><sup>+</sup></b> | 0.045                         | 0.265                                     |
| <b>K<sup>+</sup></b>              | 0.045                         | 0.131                                     |
| <b>Na<sup>+</sup></b>             | 0.000                         | 0.856                                     |
| <b>B3LYP vs MPWB1K</b>            |                               |                                           |
| <b>NH<sub>4</sub><sup>+</sup></b> | 0.085                         | 0.350                                     |
| <b>K<sup>+</sup></b>              | 0.083                         | 0.276                                     |
| <b>Na<sup>+</sup></b>             | 0.069                         | 0.726                                     |
| <b>MPWB1K vs BHHLYP</b>           |                               |                                           |
| <b>NH<sub>4</sub><sup>+</sup></b> | 0.054                         | 0.302                                     |
| <b>K<sup>+</sup></b>              | 0.055                         | 0.188                                     |
| <b>Na<sup>+</sup></b>             | 0.069                         | 0.573                                     |

**Supporting Information Table S2:** Interaction energies of  $\text{NH}_4^+$ ,  $\text{K}^+$  and  $\text{Na}^+$  with telomestatin alone, telomestatin + one G-quartet, computed with DFT, 6-31G(d,p) basis set, and three different hybrid functionals: B3LYP, BHandHLYP, and MPWB1K. The calculation of the interaction energy of the cation in the complex (BSSE corrected) has been calculated using the following equations:

$$\Delta E_{\text{int}} = E_{(\text{telomestatin}+\text{cation})} - E_{(\text{telomestatin})} - E_{(\text{cation})} - E_{(\text{BSSE})}$$

$$\Delta E_{\text{int}} = E_{(\text{G4}+\text{telomestatin}+\text{cation})} - E_{(\text{G4}+\text{telomestatin})} - E_{(\text{cation})} - E_{(\text{BSSE})}$$

|                  | Cation interaction energy with telomestatin alone (kcal/mol) | Cation interaction energy with telomestatin + G-quartet (kcal/mol) |
|------------------|--------------------------------------------------------------|--------------------------------------------------------------------|
| <b>B3LYP</b>     |                                                              |                                                                    |
| $\text{NH}_4^+$  | -84.9                                                        | -115.8                                                             |
| $\text{K}^+$     | -82.7                                                        | -119.9                                                             |
| $\text{Na}^+$    | -93.8                                                        | -141.2                                                             |
| <b>BHandHLYP</b> |                                                              |                                                                    |
| $\text{NH}_4^+$  | -87.4                                                        | -120.7                                                             |
| $\text{K}^+$     | -86.0                                                        | -117.9                                                             |
| $\text{Na}^+$    | -95.4                                                        | -147.0                                                             |
| <b>MPWB1K</b>    |                                                              |                                                                    |
| $\text{NH}_4^+$  | -88.1                                                        | -121.6                                                             |
| $\text{K}^+$     | -86.1                                                        | -124.3                                                             |
| $\text{Na}^+$    | -95.6                                                        | -145.6                                                             |
